# Supplementary material for: Mass Spectrometry-Based Metabolomics Combined with Quantitative Analysis of the Microalgal Diatom (Chaetoceros calcitrans)
Source: PubMed Central journal article supplement (PMC7459737; doi:10.3390/md18080403), 2020-07-30
Supplement: marinedrugs-18-00403-s001.pdf [file marinedrugs-18-00403-s001.pdf]

## Supplementary

# Mass Spectrometry-Based Metabolomics Combined with Quantitative Analysis of the Microalgal Diatom (*Chaetoceros calcitrans*)

Awanis Azizan <sup>1</sup>, M. Maulidiani <sup>1,2</sup>, Rudyanto, R. <sup>3</sup>, Khozirah Shaari <sup>1,4</sup>, Intan Safinar Ismail <sup>1,4</sup>, Norio Nagao <sup>5</sup> and Faridah Abas <sup>1,6\*</sup>

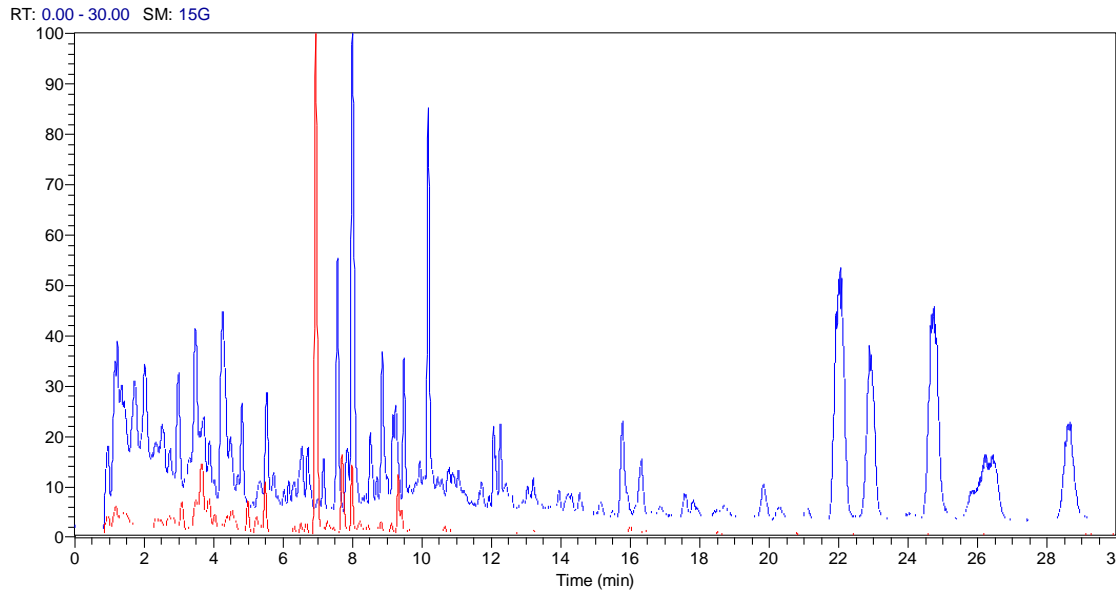

**Figure S1.** UHPLC-ESI-Orbitrap MS base peak chromatogram of the acetone extract. Retention time (0-30 minutes) obtain from microalga diatom *C. calcitrans*. Blue color represents the chromatogram acquired in positive ion mode whereas red color represents the negative ion mode.

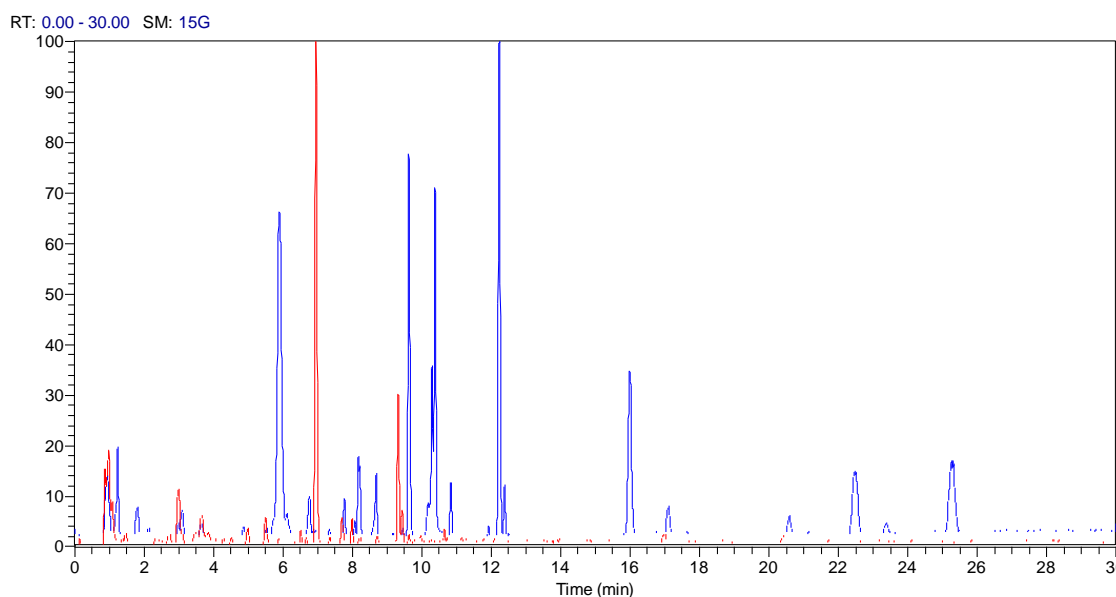

**Figure S2.** UHPLC-ESI-Orbitrap MS base peak chromatogram of the 70% ethanol extract. Retention time (0-30 minutes) obtain from microalga diatom *C. calcitrans*. Blue color represents the chromatogram acquired in positive ion mode whereas red color represents the negative ion mode.

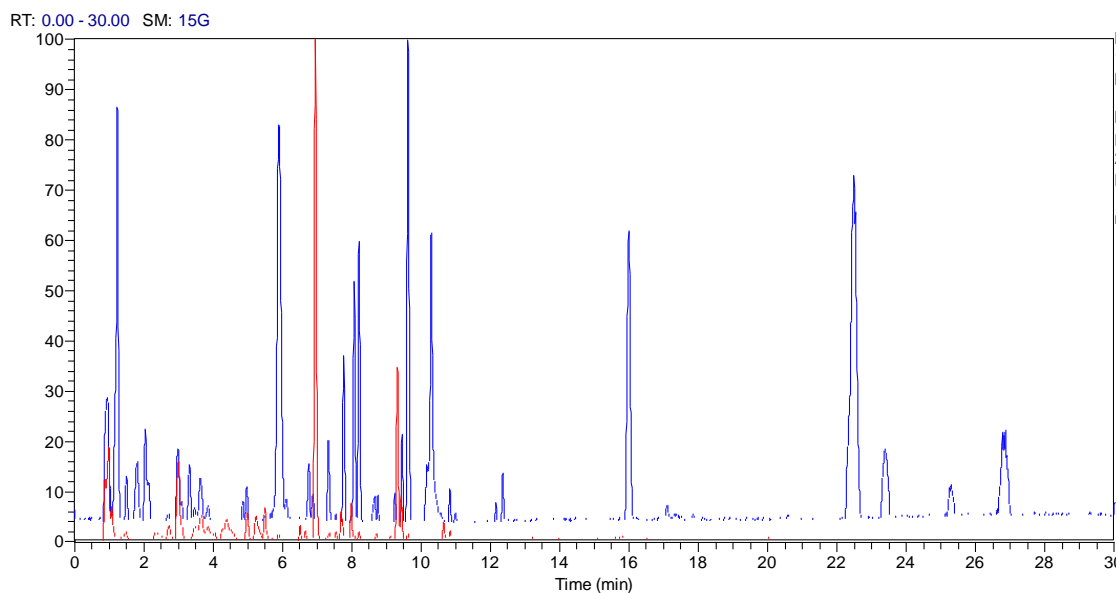

**Figure S3.** UHPLC-ESI-Orbitrap MS base peak chromatogram of the methanol extract. Retention time (0-30 minutes) obtain from microalga diatom *C. calcitrans*. Blue color represents the chromatogram acquired in positive ion mode whereas red color represents the negative ion mode.

RT: 0.00 - 30.00 SM: 15G

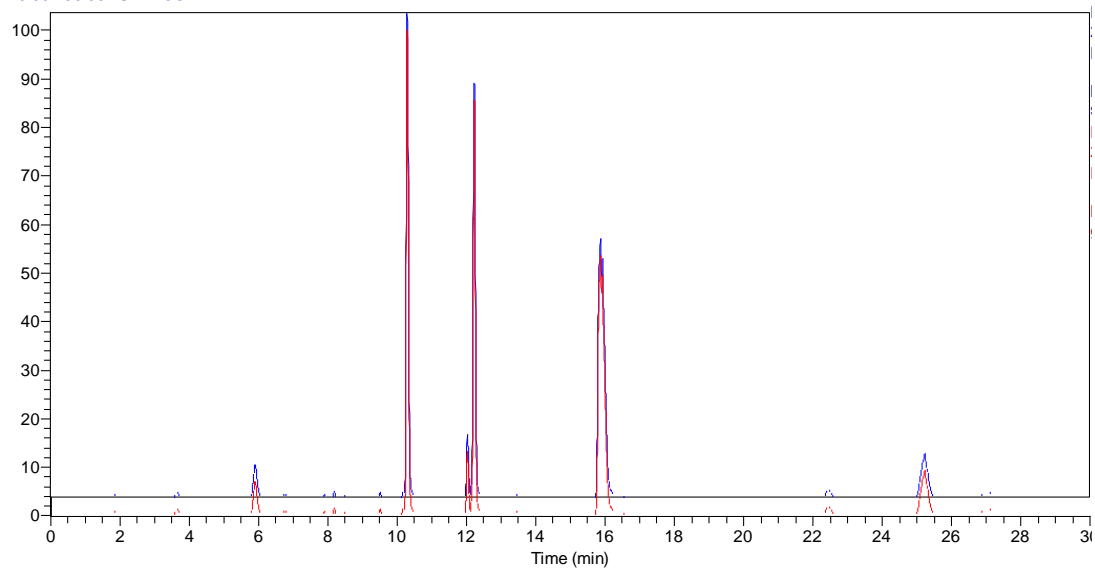

**Figure S4.** UHPLC-ESI-Orbitrap MS base peak chromatogram of the hexane extract. Retention time (0-30 minutes) obtain from microalga diatom *C. calcitrans*. Blue color represents the chromatogram acquired in positive ion mode whereas red color represents the negative ion mode.

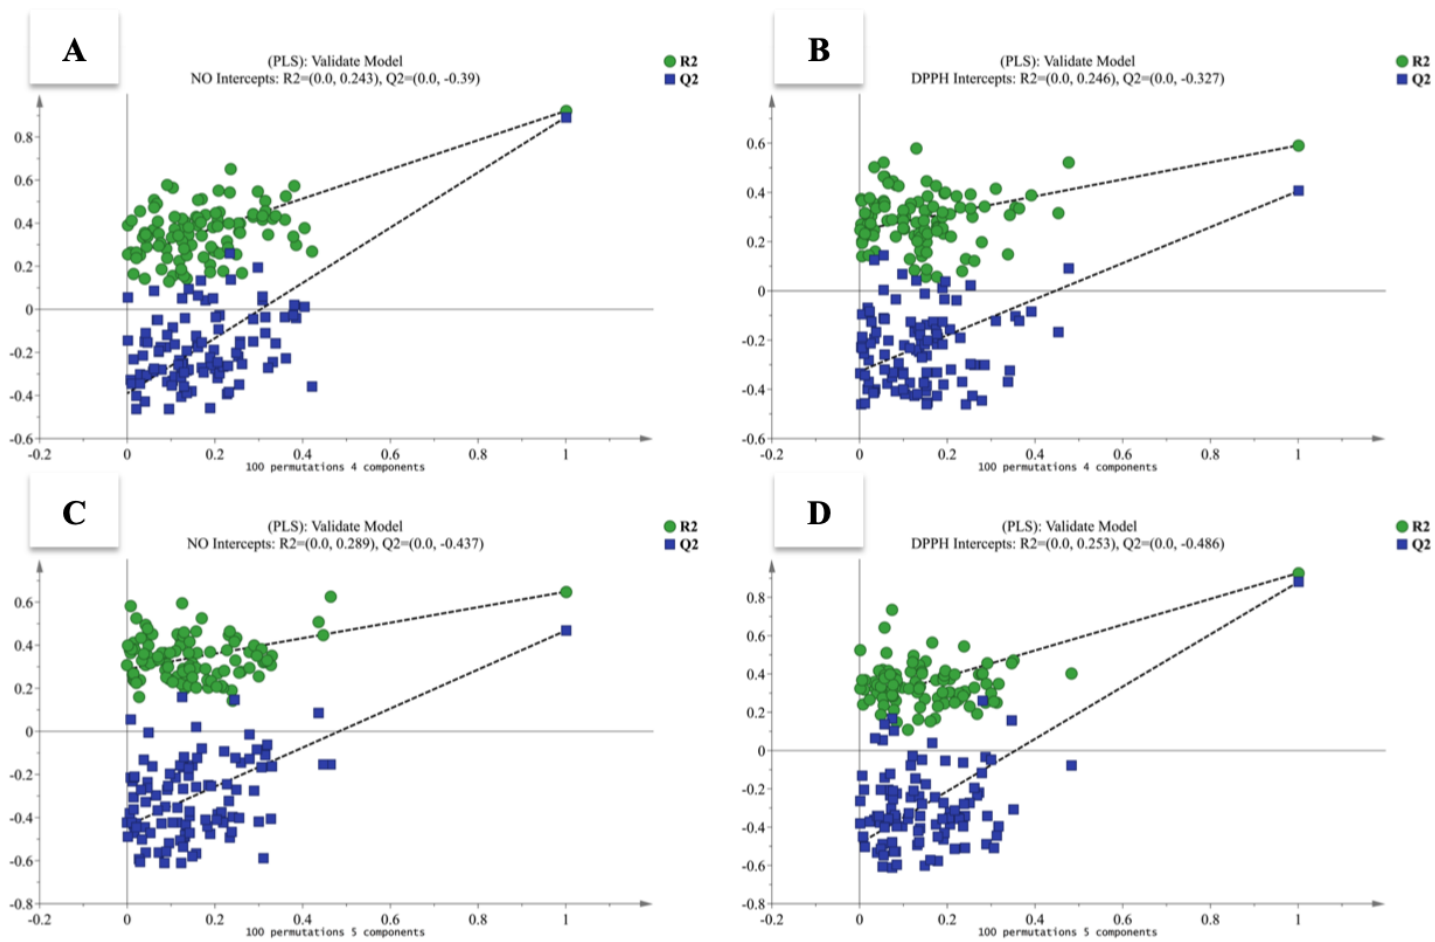

**Figure S5.** Validation PLS models using permutation test for positive ionization (A: NO, B: DPPH) and negative ionisation (C: NO, D: DPPH) UHPLC-MS based metabolite profiling data of *C. calcitrans* .

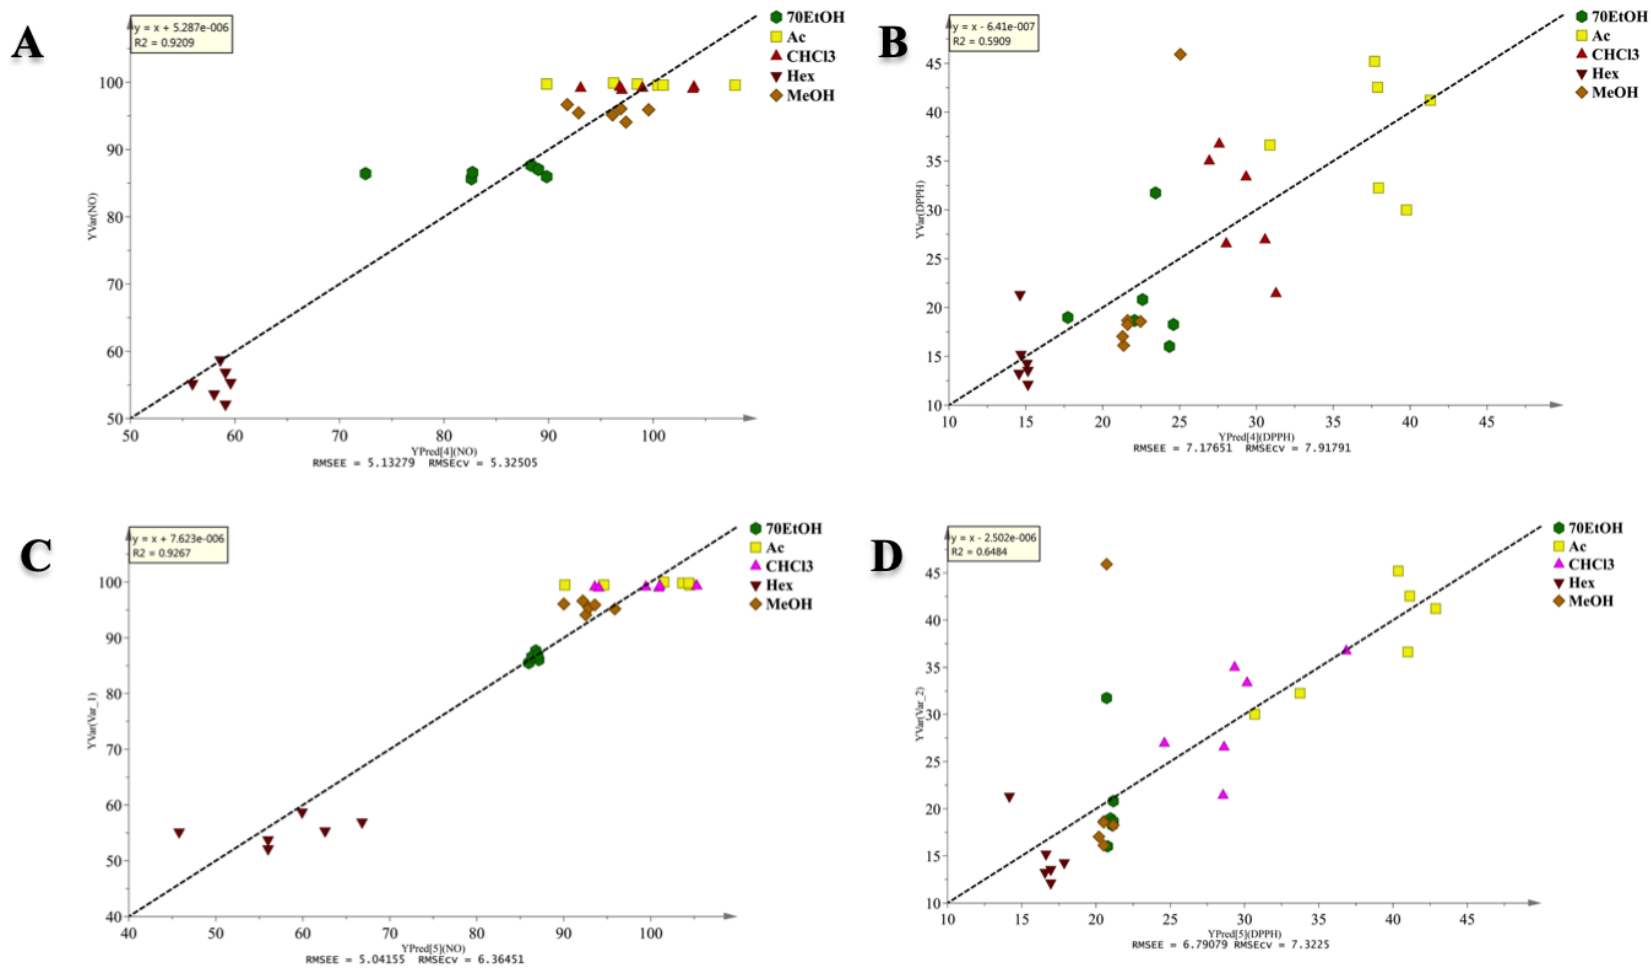

**Figure S6.** PLS derived relationship between observed vs predicted for positive ionization (A: NO, B: DPPH) and negative ionisation (C: NO, D: DPPH) UHPLC-MS based metabolite profiling data of *C. calcitrans*.

**Table 1S.** Relative quantification of compounds in the extracts of *Chaetoceros calcitrans*.

| Var ID<br>(mzmed)        | Var ID (metabolites)                                                                                    | VIP   | <i>P</i> value <sup>b</sup> |        |        |         |        |        |         |        |         |         |       |
|--------------------------|---------------------------------------------------------------------------------------------------------|-------|-----------------------------|--------|--------|---------|--------|--------|---------|--------|---------|---------|-------|
|                          |                                                                                                         |       | A vs C                      | A vs H | A vs M | A vs 7E | C vs H | C vs M | C vs 7E | H vs M | H vs 7E | M vs 7E |       |
| <b>Positive ion mode</b> |                                                                                                         |       |                             |        |        |         |        |        |         |        |         |         |       |
| 658.423                  | Fucoxanthin                                                                                             | 2.840 | 0.898                       | 0.000  | 0.000  | 0.000   | 0.000  | 0.000  | 0.000   | 0.000  | 0.105   | 0.001   | 0.218 |
| 765.483                  | C20: 5 $\Delta$ 5, $\Delta$ 8, $\Delta$ 11, $\Delta$ 14, $\Delta$ 17/<br>C15:0 phosphatidylcholine (PC) | 1.711 | 0.000                       | 0.000  | 0.117  | 0.000   | 0.000  | 0.465  | 0.000   | 0.000  | 0.000   | 0.000   | 0.000 |
| 273.222                  | 9E,11Z pentadecadienal                                                                                  | 1.433 | 0.976                       | 0.000  | 0.000  | 0.000   | 0.000  | 0.000  | 0.000   | 0.000  | 0.520   | 0.120   | 0.884 |
| 618.425                  | C18: 1 $\Delta$ 9 / C12: 0 phosphatidic<br>acid (PA)                                                    | 1.355 | 0.198                       | 0.000  | 0.000  | 0.000   | 0.000  | 0.000  | 0.000   | 0.000  | 0.999   | 0.992   | 1.000 |
| 616.413                  | Fucoxanthinol                                                                                           | 1.120 | 0.003                       | 0.000  | 0.000  | 0.000   | 0.000  | 0.000  | 0.000   | 0.000  | 0.464   | 0.893   | 0.935 |
| 608.26                   | Chlorophyll c2                                                                                          | 1.077 | 0.000                       | 0.120  | 0.000  | 0.000   | 0.000  | 0.000  | 0.000   | 0.000  | 0.078   | 0.080   | 1.000 |
| 568.409                  | Lutein                                                                                                  | 1.018 | 0.761                       | 0.000  | 0.000  | 0.000   | 0.000  | 0.000  | 0.000   | 0.000  | 1.000   | 1.000   | 1.000 |
| 391.286                  | N-stearoyl taurine                                                                                      | 1.009 | 0.381                       | 0.000  | 0.000  | 0.000   | 0.000  | 0.000  | 0.000   | 0.000  | 0.479   | 0.063   | 0.767 |
| 600.399                  | Neoxanthin                                                                                              | 1.001 | 0.001                       | 0.000  | 0.000  | 0.000   | 0.000  | 0.000  | 0.000   | 0.000  | 1.000   | 1.000   | 1.000 |
| <b>Negative ion mode</b> |                                                                                                         |       |                             |        |        |         |        |        |         |        |         |         |       |
| 318.215                  | 5 or 15-HEPE                                                                                            | 2.065 | 0.193                       | 0.000  | 0.000  | 0.000   | 0.000  | 0.000  | 0.000   | 0.000  | 0.466   | 0.147   | 0.948 |
| 328.236                  | Docosahexanoic acid                                                                                     | 2.019 | 0.636                       | 0.000  | 0.000  | 0.000   | 0.000  | 0.000  | 0.000   | 0.000  | 0.002   | 0.000   | 0.927 |
| 318.215                  | 5 or 15-HEPE                                                                                            | 1.771 | 0.101                       | 0.000  | 0.000  | 0.000   | 0.000  | 0.000  | 0.000   | 0.000  | 0.732   | 0.874   | 0.218 |
| 254.22                   | 3-Hexadecenoic acid                                                                                     | 1.356 | 0.998                       | 0.000  | 0.000  | 0.000   | 0.000  | 0.000  | 0.000   | 0.000  | 0.293   | 0.979   | 0.608 |
| 302.221                  | Eicosapentaenoic acid                                                                                   | 1.190 | 0.000                       | 0.000  | 0.000  | 0.000   | 0.000  | 0.962  | 0.953   | 0.953  | 1.000   | 1.000   | 1.000 |
| 304.236                  | Arachidonic acid                                                                                        | 1.118 | 0.622                       | 0.000  | 0.000  | 0.000   | 0.000  | 0.000  | 0.000   | 0.000  | 0.007   | 0.001   | 0.960 |

*P* values were results of Tukey-HSD pairwise multiple-comparison tests using SPSS 16.0. Significant level:  $P > 0.050$ , not significant;  $0.050 \geq P > 0.010$ , significant\*;  $0.010 \geq P > 0.001$ , very significant\*\*; and  $0.001 \geq P$ , highly significant\*\*\*. Letters indicate the three extraction solvents of *Chaetoceros calcitrans*: (A) Acetone, (C) CHCl<sub>3</sub>, (H) Hexane, (M) Methanol and (7E) 70% Ethanol.
